# Supplementary material
Source: MDPI journal article supplement (https://www.mdpi.com/2075-163X/12/8/924)
Supplement: s1 [file s1]

# Supplementary Materials: Charge Distribution and Bond Valence Sum Analysis of Sulfosalts. The ECoN21 computer program.

Gheorghe Ilinca

Table S1. Crystal Structures Used for Figure 12.

|    | Mineral                        | Structure-derived Formula                                                                                                           | Space Group                  | Reference        |
|----|--------------------------------|-------------------------------------------------------------------------------------------------------------------------------------|------------------------------|------------------|
| 1  | Aikinite                       | PbCuBiS <sub>3</sub>                                                                                                                | <i>P n m a</i>               | ICSD-0009395     |
| 2  | Andorite–VI                    | PbAgSb <sub>3</sub> S <sub>6</sub>                                                                                                  | <i>P n 2<sub>1</sub> a</i>   | ICSD-65132       |
| 3  | Andorite–VI                    | PbAgSb <sub>3</sub> S <sub>6</sub>                                                                                                  | <i>P n a 2<sub>1</sub></i>   | Topa, D. – PC    |
| 4  | Aramayoite                     | Ag <sub>0.83</sub> Bi <sub>0.33</sub> S <sub>2</sub> Sb <sub>0.625</sub>                                                            | <i>P 1</i>                   | ICSD-8165        |
| 5  | Aramayoite                     | Ag <sub>3</sub> BiSb <sub>2</sub> S <sub>6</sub>                                                                                    | <i>P –1</i>                  | ICSD-94646       |
| 6  | Argentobaumhauerite            | Cu <sub>0.06</sub> Ag <sub>1.20</sub> As <sub>32.28</sub> Tl <sub>0.18</sub> Pb <sub>21.46</sub> Sb <sub>0.56</sub> S <sub>72</sub> | <i>P –1</i>                  | [41]             |
| 7  | Argentoliveingite              | Ag <sub>3.50</sub> As <sub>51.50</sub> Pb <sub>33</sub> S <sub>112</sub>                                                            | <i>P –1</i>                  | [16]             |
| 8  | Arsiccioite                    | Ag <sub>0.88</sub> Hg <sub>1.91</sub> TlAs <sub>1.58</sub> Cu <sub>0.13</sub> Sb <sub>0.42</sub> Zn <sub>0.08</sub> S <sub>6</sub>  | <i>I –4 2 m</i>              | ICSD-5319        |
| 9  | Aschamalmite                   | Pb <sub>5.9</sub> Bi <sub>2.082</sub> S <sub>9</sub>                                                                                | <i>C 1 2/m 1</i>             | ICSD-166294      |
| 10 | Barikaite                      | Ag <sub>3</sub> Pb <sub>9.736</sub> As <sub>11.59</sub> Sb <sub>7.668</sub> S <sub>40</sub>                                         | <i>P 1 2<sub>1</sub>/n 1</i> | ICSD-291507      |
| 11 | Baumhauerite                   | Pb <sub>11.62</sub> As <sub>16.6</sub> S <sub>36</sub>                                                                              | <i>P 1</i>                   | COD-9008167      |
| 12 | Baumhauerite                   | As <sub>9</sub> Pb <sub>5</sub> S <sub>18</sub>                                                                                     | <i>P –1</i>                  | COD-9011046      |
| 13 | Baumstarkite                   | Ag <sub>3</sub> As <sub>0.04</sub> Bi <sub>0.026</sub> Sb <sub>2.934</sub> S <sub>6</sub>                                           | <i>P –1</i>                  | ICSD-94645       |
| 14 | Benjaminite                    | Cu <sub>0.5</sub> Pb <sub>0.4</sub> Ag <sub>2.3</sub> Bi <sub>6.8</sub> S <sub>12</sub>                                             | <i>C 1 2/m 1</i>             | ICSD-41752       |
| 15 | Benjaminite (unsubstituted)    | Ag <sub>3</sub> Bi <sub>7</sub> S <sub>12</sub>                                                                                     | <i>C 1 2/m 1</i>             | ICSD-100734      |
| 16 | Bernardite                     | TlAs <sub>5</sub> S <sub>8</sub>                                                                                                    | <i>P 1 2<sub>1</sub>/c 1</i> | ICSD-63481       |
| 17 | Bernarlottiite                 | Pb <sub>11.93</sub> As <sub>10</sub> Sb <sub>6.07</sub> S <sub>36</sub>                                                             | <i>P –1</i>                  | ICSD-230065      |
| 18 | Berryite                       | Cu <sub>3</sub> Ag <sub>2</sub> Pb <sub>3</sub> Bi <sub>7</sub> S <sub>16</sub>                                                     | <i>P 1 2<sub>1</sub>/m 1</i> | ICSD-156649      |
| 19 | Berryite                       | Cu <sub>3</sub> Ag <sub>2</sub> Pb <sub>3</sub> Bi <sub>7</sub> S <sub>16</sub>                                                     | <i>P 2<sub>1</sub> m a</i>   | ICSD-8757        |
| 20 | Berthierite                    | FeS <sub>4</sub> Sb <sub>2</sub>                                                                                                    | <i>P n a m</i>               | ICSD-56378-79675 |
| 21 | Bismuthinite                   | Bi <sub>2</sub> S <sub>3</sub>                                                                                                      | <i>P b n m</i>               | ICSD-30775       |
| 22 | Bismuthinite                   | Bi <sub>2</sub> S <sub>3</sub>                                                                                                      | <i>P n m a</i>               | AMCSD-0003562    |
| 23 | Bohdanowiczite                 | AgBiSe <sub>2</sub>                                                                                                                 | <i>P –3 m 1</i>              | ICSD-604856      |
| 24 | Boscardinite                   | Tl <sub>1.23</sub> Pb <sub>2.956</sub> Ag <sub>0.29</sub> As <sub>1.73</sub> Sb <sub>7.794</sub> S <sub>18</sub>                    | <i>P –1</i>                  | ICSD-185799      |
| 25 | Boscardinite, (Tl,As)–enriched | Tl <sub>1.51</sub> Pb <sub>2.1</sub> Ag <sub>0.4</sub> As <sub>2.86</sub> Sb <sub>7.13</sub> S <sub>18</sub>                        | <i>P –1</i>                  | ICSD-259026      |
| 26 | Boulangerite                   | Pb <sub>5</sub> Sb <sub>4</sub> S <sub>11</sub>                                                                                     | <i>P 1 2<sub>1</sub>/a 1</i> | ICSD-68663       |
| 27 | Bournonite                     | CuPbSbS <sub>3</sub>                                                                                                                | <i>P n 2<sub>1</sub> m</i>   | ICSD-14303       |
| 28 | Bournonite                     | CuPbSbS <sub>3</sub>                                                                                                                | <i>P n 2<sub>1</sub> m</i>   | ICSD-182267      |
| 29 | Cannizzarite                   | Pb <sub>3.792</sub> Cd <sub>0.812</sub> In <sub>0.208</sub> Bi <sub>6.188</sub> S <sub>13.539</sub> Se <sub>0.461</sub>             | <i>P 1 2<sub>1</sub>/m 1</i> | ICSD-185805      |
| 30 | Cannizzarite                   | Pb <sub>25</sub> Bi <sub>27</sub> S <sub>62.39</sub> Se <sub>3.61</sub>                                                             | <i>P 1 2<sub>1</sub>/m 1</i> | COD-9015362      |
| 31 | Cannizzarite                   | Pb <sub>46</sub> Bi <sub>54</sub> S <sub>127</sub>                                                                                  | <i>P 1 2<sub>1</sub>/m 1</i> | ICSD-49716       |
| 32 | Carducciite                    | Ag <sub>1.05</sub> Pb <sub>5.84</sub> Sb <sub>4.48</sub> As <sub>4.63</sub> S <sub>20</sub>                                         | <i>P 1 2<sub>1</sub>/c 1</i> | ICSD-239831      |
| 33 | Chabourneite                   | Tl <sub>16.85</sub> Pb <sub>6.13</sub> As <sub>39.51</sub> Sb <sub>41.51</sub> S <sub>136</sub>                                     | <i>P 1</i>                   | ICSD-242231      |
| 34 | Chalcostibite                  | CuSbS <sub>2</sub>                                                                                                                  | <i>P n m a</i>               | AMCSD-0010509    |
| 35 | Chovanite                      | Pb <sub>13.43</sub> Sb <sub>15.57</sub> S <sub>36</sub> O <sub>0.18</sub>                                                           | <i>C 1 2/m 1</i>             | ICSD-186039      |
| 36 | Clino-oskarkempffite           | Ag <sub>15</sub> Pb <sub>6</sub> Sb <sub>21</sub> Bi <sub>18</sub> S <sub>72</sub>                                                  | <i>P 2<sub>1</sub> / c</i>   | [42]             |
| 37 | Cosalite                       | Cu <sub>0.044</sub> Ag <sub>0.02</sub> Pb <sub>1.48</sub> Sb <sub>0.149</sub> Bi <sub>2.3</sub> S <sub>5</sub>                      | <i>P n m a</i>               | ICSD-760258      |
| 38 | Cosalite                       | Cu <sub>0.36</sub> Ag <sub>0.06</sub> Pb <sub>7.8</sub> Bi <sub>8.02</sub> S <sub>20</sub>                                          | <i>P n m a</i>               | ICSD-169943      |
| 39 | Cosalite                       | Cu <sub>1.14</sub> Ag <sub>0.12</sub> Pb <sub>7.38</sub> Bi <sub>7.97</sub> S <sub>20</sub>                                         | <i>P n m a</i>               | ICSD-169944      |
| 40 | Cosalite                       | Cu <sub>0.12</sub> Ag <sub>0.26</sub> Pb <sub>7.6</sub> Bi <sub>8.16</sub> S <sub>20</sub>                                          | <i>P n m a</i>               | ICSD-169945      |
| 41 | Cosalite                       | Cu <sub>0.92</sub> Ag <sub>0.46</sub> Pb <sub>7.12</sub> Bi <sub>8.14</sub> S <sub>20</sub>                                         | <i>P n m a</i>               | ICSD-169947      |

|    |                        |                                                                                                               |               |                    |
|----|------------------------|---------------------------------------------------------------------------------------------------------------|---------------|--------------------|
| 42 | Cosalite               | $\text{Cu}_{0.38}\text{Ag}_{0.86}\text{Pb}_{6.63}\text{Bi}_{8.49}\text{Sb}_{0.89}\text{S}_{20}$               | $P n m a$     | ICSD-169948        |
| 43 | Cosalite               | $\text{Cu}_{0.96}\text{Ag}_{1.11}\text{Pb}_{6.87}\text{Bi}_{8.06}\text{S}_{20}$                               | $P n m a$     | ICSD-169946        |
| 44 | Crookesite             | $\text{TiCu}_{6.52}\text{Se}_4$                                                                               | $I 4/m$       | ICSD-69106         |
| 45 | Cupromakopavonite      | $\text{Cu}_4\text{Ag}_{1.621}\text{Pb}_2\text{Bi}_{9.379}\text{S}_{19}$                                       | $C 1 2/m 1$   | ICSD-185802        |
| 46 | Cupromakovickyite      | $\text{Cu}_8\text{Ag}_{2.08}\text{Pb}_4\text{Bi}_{17.92}\text{S}_{36}$                                        | $C 1 2/m 1$   | ICSD-160421        |
| 47 | Cupronyite             | $\text{Cu}_{3.5}\text{Ag}_{0.44}\text{Pb}_{12.27}\text{Bi}_{13.19}\text{S}_{34}$                              | $C 1 2/m 1$   | ICSD-185803        |
| 48 | Cupropavonite (5,5P)   | $\text{AgCu}_2\text{PbBi}_5\text{S}_{10}$                                                                     | $C 1 2/m 1$   | ICSD-259055-259056 |
| 49 | Dadsonite              | $\text{Pb}_{10.6}\text{Sb}_{13.4}\text{S}_{30}\text{Cl}_{0.5}$                                                | $P -1$        | ICSD-156239-156240 |
| 50 | Dantopaite             | $\text{Ag}_{2.1}\text{Cu}_{1.1}\text{Pb}_{0.9}\text{Bi}_{14.38}\text{S}_{22}$                                 | $C 1 2/m 1$   | ICSD-169962        |
| 51 | Dekatriasartorite      | $\text{TiPb}_{58}\text{As}_{97}\text{S}_{204}$                                                                | $P 2_1/c$     | Topa, D. – PC      |
| 52 | Dufrenoyite            | $\text{Pb}_8\text{As}_8\text{S}_{20}$                                                                         | $P 1 2_1 1$   | ICSD-27301         |
| 53 | Eclarite               | $\text{Cu}_{0.81}\text{Fe}_{0.48}\text{Pb}_{8.14}\text{Bi}_{12.59}\text{S}_{28}$                              | $P m c n$     | ICSD-185804        |
| 54 | Eclarite               | $\text{Cu}_{0.5}\text{Fe}_{0.5}\text{Pb}_9\text{Bi}_{12}\text{S}_{28}$                                        | $P n m a$     | ICSD-31382         |
| 55 | Enneasartorite         | $\text{Ti}_{1.50}\text{Pb}_8\text{As}_{17.50}\text{S}_{35}$                                                   | $P 2_1/c$     | [43]               |
| 56 | Freibergite            | $\text{Ag}_{1.4}\text{Cu}_{10.6}\text{Sb}_4\text{S}_{13}$                                                     | $I -4 3 m$    | ICSD-23644         |
| 57 | Freibergite            | $\text{Ag}_{4.32}\text{Cu}_6\text{Fe}_{1.68}\text{Sb}_4\text{S}_{13}$                                         | $I -4 3 m$    | ICSD-62115         |
| 58 | Freieslebenite         | $\text{PbAgSbS}_3$                                                                                            | $P 1 2_1/a 1$ | ICSD-24257         |
| 59 | Freieslebenite         | $\text{PbAgSbS}_3$                                                                                            | $P 1 2_1/a 1$ | ICSD-8166          |
| 60 | Friedrichite           | $\text{Cu}_{1.5}\text{Pb}_{1.5}\text{Bi}_2\text{S}_6$                                                         | $P b 21 m$    | ICSD-107612        |
| 61 | Fülöppite              | $\text{Pb}_3\text{Sb}_8\text{S}_{15}$                                                                         | $C 1 2/c 1$   | ICSD-8168-41849    |
| 62 | Galenobismutite        | $\text{Pb}_{1.15}\text{Bi}_{1.82}\text{S}_{3.584}\text{Se}_{0.262}\text{Cl}_{0.156}$                          | $P n a m$     | ICSD-156647-156648 |
| 63 | Galenobismutite        | $\text{PbBi}_2\text{S}_{3.87}\text{Se}_{0.13}$                                                                | $P n a m$     | ICSD-156634        |
| 64 | Galenobismutite        | $\text{PbBi}_2\text{S}_4$                                                                                     | $P n a m$     | ICSD-23905         |
| 65 | Galenobismutite        | $\text{PbBi}_2\text{S}_4$                                                                                     | $P n m a$     | ICSD-167007        |
| 66 | Galenobismutite        | $\text{PbBi}_2\text{S}_4$                                                                                     | $P n m a$     | ICSD-31859         |
| 67 | Geocronite             | $\text{Pb}_{28}\text{As}_5\text{Sb}_7\text{S}_{46}$                                                           | $P 1 21/m 1$  | ICSD-41808         |
| 68 | Gladite                | $\text{PbCuBi}_5\text{S}_9$                                                                                   | $P b n m$     | ICSD-167           |
| 69 | Gladite                | $\text{CuPbBi}_5\text{S}_9$                                                                                   | $P b n m$     | ICSD-41971         |
| 70 | Gladite                | $\text{Cu}_{1.63}\text{Pb}_{1.63}\text{Bi}_{6.37}\text{S}_{12}$                                               | $P m c n$     | ICSD-95923         |
| 71 | Gladite                | $\text{Cu}_{1.33}\text{Pb}_{1.33}\text{Bi}_{6.67}\text{S}_{12}$                                               | $P m c n$     | ICSD-95924         |
| 72 | Gustavite              | $\text{PbAg}_{0.99}\text{Bi}_{2.9}\text{Sb}_{0.11}\text{S}_6$                                                 | $P 1 2_1/c 1$ | ICSD-183561        |
| 73 | Gustavite – Sb-rich    | $\text{AgPbBi}_{1.998}\text{Sb}_{0.911}\text{S}_6$                                                            | $P 1 2_1/c 1$ | ICSD-260613        |
| 74 | Hammarite              | $\text{Cu}_2\text{Pb}_2\text{Bi}_4\text{S}_9$                                                                 | $P b n m$     | ICSD-60156         |
| 75 | Hendekasartorite       | $\text{Ti}_2\text{Pb}_{48}\text{As}_{82}\text{S}_{172}$                                                       | $P 2_1/c$     | [44]               |
| 76 | Heptasartorite         | $\text{Ti}_7\text{Pb}_{21.10}\text{As}_{55.70}\text{S}_{108}$                                                 | $P 2_1/c$     | [43]               |
| 77 | Heyrovskyite           | $\text{Ag}_{1.31}\text{Pb}_{3.37}\text{Bi}_{3.32}\text{S}_9$                                                  | $C m c m$     | ICSD-69962         |
| 78 | Heyrovskyite           | $\text{Pb}_6\text{Bi}_2\text{S}_9$                                                                            | $B b m m$     | COD-9012885        |
| 79 | Heyrovskyite           | $\text{Pb}_6\text{Bi}_2\text{S}_9$                                                                            | $C m c m$     | ICSD-186916        |
| 80 | Heyrovskyite (Ag-free) | $\text{Pb}_{5.82}\text{Bi}_{2.12}\text{S}_{8.7}\text{Se}_{0.3}$                                               | $B b m m$     | ICSD-181335        |
| 81 | Hodrushite             | $\text{Cu}_{7.8}\text{Ag}_{0.42}\text{Bi}_{11.58}\text{S}_{22}$                                               | $C 1 2/m 1$   | ICSD-55313         |
| 82 | Hodrushite (Cu-rich)   | $\text{Cu}_{8.5}\text{Bi}_{11.75}\text{S}_{22}$                                                               | $C 1 2/m 1$   | ICSD-55314         |
| 83 | Hutchinsonite          | $\text{TiPbAs}_{4.782}\text{Sb}_{0.218}\text{S}_9$                                                            | $P b c a$     | ICSD-74765         |
| 84 | Hutchinsonite          | $\text{TiPbAs}_5\text{S}_9$                                                                                   | $P b c a$     | ICSD-26785         |
| 85 | Incomsartorite         | $\text{Pb}_{1.13}\text{As}_{1.87}\text{S}_{3.97}$                                                             | $P 2_1/n$     | [17]               |
| 86 | Izoklakeite            | $\text{Pb}_{51.3}\text{Sb}_{20.4}\text{Bi}_{19.5}\text{Ag}_{1.2}\text{Cu}_{2.9}\text{Fe}_{0.7}\text{S}_{114}$ | $P n n m$     | ICSD-30976         |
| 87 | Izoklakeite            | $\text{Pb}_{55.4}\text{Cu}_{2.6}\text{Fe}_{1.4}\text{Bi}_{23.1}\text{Sb}_{13.6}\text{S}_{114}$                | $P n n m$     | ICSD-202309        |
| 88 | Jamesonite             | $\text{FePb}_4\text{Sb}_6\text{S}_{14}$                                                                       | $P 1 2_1/a 1$ | ICSD-24256         |
| 89 | Jamesonite             | $\text{FePb}_4\text{Sb}_6\text{S}_{14}$                                                                       | $P 1 2_1/c 1$ | ICSD-98580         |
| 90 | Jankovicite            | $\text{Ti}_5\text{As}_{2.933}\text{Sb}_{10.067}\text{S}_{22}$                                                 | $P -1$        | ICSD-79846         |
| 91 | Jaskolskiite           | $\text{Cu}_{0.16}\text{Pb}_{1.65}\text{Bi}_{1.04}\text{Sb}_{1.31}\text{S}_5$                                  | $P b n m$     | ICSD-30972         |
| 92 | Jasrouxite             | $\text{Pb}_{3.85}\text{Ag}_{19.09}\text{As}_{15.49}\text{Sb}_{21.57}\text{S}_{72}$                            | $P -1$        | ICSD-190968        |

|     |                         |                                                                                                                                                |                                           |              |
|-----|-------------------------|------------------------------------------------------------------------------------------------------------------------------------------------|-------------------------------------------|--------------|
| 903 | Jordanite               | Pb <sub>28</sub> As <sub>12</sub> S <sub>46</sub>                                                                                              | <i>P</i> 1 2 <sub>1</sub> / <i>m</i> 1    | ICSD-8167    |
| 94  | Jordanite               | As <sub>3.5</sub> Pb <sub>6.5</sub> S <sub>11.75</sub>                                                                                         | <i>P</i> 1 2 <sub>1</sub> / <i>m</i> 1    | ICSD-24451   |
| 95  | Junoite                 | Cu <sub>2</sub> Pb <sub>3</sub> Bi <sub>8</sub> S <sub>13.2</sub> Se <sub>2.8</sub>                                                            | <i>C</i> 1 2/ <i>m</i> 1                  | ICSD-30777   |
| 96  | Kobellite               | Cu <sub>1.12</sub> Fe <sub>0.88</sub> Pb <sub>12</sub> Bi <sub>7.89</sub> Sb <sub>6.11</sub> S <sub>35</sub>                                   | <i>P</i> <i>n n m</i>                     | ICSD-23595   |
| 97  | Kobellite, selenian     | Cu <sub>0.4</sub> Fe <sub>0.3</sub> Pb <sub>5.8</sub> Bi <sub>3.413</sub> Sb <sub>3.787</sub> S <sub>15.99</sub> Se <sub>1.46</sub>            | <i>P</i> <i>n n m</i>                     | ICSD-291435  |
| 98  | Krupkaite               | CuPbBi <sub>3</sub> S <sub>6</sub>                                                                                                             | <i>P</i> <i>b</i> 2 <sub>1</sub> <i>m</i> | ICSD-41970   |
| 99  | Krupkaite               | CuPbBi <sub>3</sub> S <sub>6</sub>                                                                                                             | <i>P</i> <i>m c</i> 2 <sub>1</sub>        | ICSD-30776   |
| 100 | Krupkaite               | Cu <sub>2.24</sub> Pb <sub>2.36</sub> Bi <sub>5.64</sub> S <sub>12</sub>                                                                       | <i>P</i> <i>m c</i> 2 <sub>1</sub>        | ICSD-95925   |
| 101 | Krupkaite               | Cu <sub>1.95</sub> Pb <sub>1.95</sub> Bi <sub>6.05</sub> S <sub>12</sub>                                                                       | <i>P</i> <i>m c</i> 2 <sub>1</sub>        | ICSD-95926   |
| 102 | Krupkaite               | Cu <sub>2</sub> Pb <sub>2</sub> Bi <sub>6</sub> S <sub>12</sub>                                                                                | <i>P</i> <i>m c</i> 2 <sub>1</sub>        | ICSD-95927   |
| 103 | Krupkaite               | Cu <sub>2</sub> Pb <sub>2</sub> Bi <sub>6</sub> S <sub>12</sub>                                                                                | <i>P</i> <i>m c</i> 2 <sub>1</sub>        | ICSD-160417  |
| 104 | Krupkaite               | Cu <sub>2</sub> Pb <sub>2</sub> Bi <sub>6</sub> S <sub>12</sub>                                                                                | <i>P</i> <i>m c</i> 2 <sub>1</sub>        | ICSD-160419  |
| 105 | Kudriavite              | Cd <sub>0.5</sub> In <sub>0.19</sub> Pb <sub>0.53</sub> Bi <sub>1.78</sub> S <sub>3.8</sub> Se <sub>0.2</sub>                                  | <i>C</i> 1 2/ <i>m</i> 1                  | ICSD-157295  |
| 106 | Kupčikite               | Cu <sub>3.42</sub> Fe <sub>0.58</sub> Bi <sub>5</sub> S <sub>10</sub>                                                                          | <i>C</i> 1 2/ <i>m</i> 1                  | ICSD-55302   |
| 107 | Lillianite              | Pb <sub>2.962</sub> Bi <sub>1.962</sub> S <sub>5.76</sub> Se <sub>0.24</sub>                                                                   | <i>B</i> <i>b m m</i>                     | ICSD-156633  |
| 108 | Lillianite              | Bi <sub>2</sub> Pb <sub>3</sub> S <sub>6</sub>                                                                                                 | <i>B</i> <i>b m m</i>                     | ICSD-158374  |
| 109 | Lillianite              | Pb <sub>3</sub> Bi <sub>2</sub> S <sub>6</sub>                                                                                                 | <i>B</i> <i>b m m</i>                     | ICSD-2737    |
| 110 | Lindströmite            | Cu <sub>3</sub> Pb <sub>3</sub> Bi <sub>7</sub> S <sub>15</sub>                                                                                | <i>P</i> <i>m c</i> 2 <sub>1</sub>        | ICSD-41892   |
| 111 | Lindströmite            | Cu <sub>2.5</sub> Pb <sub>2.4</sub> Bi <sub>5.6</sub> S <sub>12</sub>                                                                          | <i>P</i> <i>m c n</i>                     | ICSD-160416  |
| 112 | Lindströmite            | Cu <sub>2.66</sub> Pb <sub>2.4</sub> Bi <sub>5.6</sub> S <sub>12</sub>                                                                         | <i>P</i> <i>m c n</i>                     | ICSD-160418  |
| 113 | Lindströmite            | Cu <sub>3</sub> Pb <sub>3</sub> Bi <sub>7</sub> S <sub>15</sub>                                                                                | <i>P</i> <i>b n m</i>                     | ICSD-200113  |
| 114 | Liveingite (Rathite II) | Pb <sub>18.5</sub> As <sub>25.25</sub> S <sub>56</sub>                                                                                         | <i>P</i> 1 2 <sub>1</sub> 1               | ICSD-14249   |
| 115 | Makovickyite            | Ag <sub>1.36</sub> Cu <sub>2.124</sub> Bi <sub>11.2</sub> S <sub>18</sub>                                                                      | <i>C</i> 1 2/ <i>m</i> 1                  | ICSD-160420  |
| 116 | Menchettiite            | AgPb <sub>2.40</sub> Mn <sub>1.60</sub> Sb <sub>3</sub> As <sub>2</sub> S <sub>12</sub>                                                        | <i>P</i> 1 2 <sub>1</sub> / <i>n</i> 1    | COD-9015852  |
| 117 | Meneghinite (Cu–poor)   | Cu <sub>0.58</sub> Pb <sub>12.72</sub> (Sb <sub>7.04</sub> Bi <sub>0.24</sub> )S <sub>24</sub>                                                 | <i>P</i> <i>n m a</i>                     | ICSD-97027   |
| 118 | Moëloite                | Pb <sub>6</sub> Sb <sub>3</sub> S <sub>17</sub>                                                                                                | <i>P</i> 2 <sub>1</sub> 2 2 <sub>1</sub>  | ICSD-94852   |
| 119 | Nuffieldite             | Pb <sub>2.37</sub> Cu <sub>1.37</sub> Bi <sub>2.39</sub> Sb <sub>0.24</sub> S <sub>7</sub>                                                     | <i>P</i> <i>b n m</i>                     | ICSD-84625   |
| 120 | Nuffieldite             | Pb <sub>2.5</sub> CuBi <sub>2.5</sub> S <sub>7</sub>                                                                                           | <i>P</i> <i>b n m</i>                     | ICSD-15229   |
| 121 | Owyheeite               | Ag <sub>1.5</sub> Pb <sub>4.43</sub> Sb <sub>6.07</sub> S <sub>14</sub>                                                                        | <i>P</i> 1 2 <sub>1</sub> / <i>c</i> 1    | ICSD-158202  |
| 122 | Oyonite                 | Cu <sub>0.38</sub> Ag <sub>2.48</sub> Mn <sub>1.75</sub> Pb <sub>3.79</sub> Sb <sub>7.55</sub> As <sub>4.05</sub> S <sub>24.12</sub>           | <i>P</i> 2 <sub>1</sub> / <i>n</i>        | [45]         |
| 123 | Paarite                 | Cu <sub>1.6</sub> Pb <sub>1.6</sub> Bi <sub>6.4</sub> S <sub>12</sub>                                                                          | <i>P</i> <i>m c n</i>                     | ICSD-92980   |
| 124 | Padëraite               | Cu <sub>7.09</sub> Ag <sub>0.2</sub> Pb <sub>1.37</sub> Bi <sub>11.34</sub> S <sub>22</sub>                                                    | <i>P</i> 1 2 <sub>1</sub> / <i>m</i> 1    | ICSD-156650  |
| 125 | Padëraite               | Cu <sub>7.32</sub> Pb <sub>1.34</sub> Bi <sub>11.34</sub> S <sub>22</sub>                                                                      | <i>P</i> 1 2 <sub>1</sub> / <i>m</i> 1    | ICSD-156651  |
| 126 | Padëraite               | Cu <sub>6</sub> AgPbBi <sub>12</sub> S <sub>22</sub>                                                                                           | <i>P</i> 1 2 <sub>1</sub> / <i>m</i> 1    | ICSD-63260   |
| 127 | Parapierrotite          | TlSb <sub>5</sub> S <sub>8</sub>                                                                                                               | <i>P</i> 1 <i>n</i> 1                     | ICSD-9008291 |
| 128 | Parasterryite           | Ag <sub>4</sub> Pb <sub>20.21</sub> As <sub>10.23</sub> Sb <sub>13.56</sub> S <sub>58</sub>                                                    | <i>P</i> 1 2 <sub>1</sub> / <i>c</i> 1    | ICSD-11023   |
| 129 | Pavonite 4P             | AgBi <sub>6</sub> S <sub>9</sub>                                                                                                               | <i>C</i> 1 2/ <i>m</i> 1                  | ICSD-69454   |
| 130 | Pavonite 4P, cuprian    | Ag <sub>0.2</sub> Cu <sub>1.08</sub> Bi <sub>6</sub> S <sub>9</sub>                                                                            | <i>C</i> 1 2/ <i>m</i> 1                  | ICSD-69455   |
| 131 | Pavonite 4P, cuprian    | Ag <sub>0.6</sub> Cu <sub>0.48</sub> Bi <sub>6</sub> S <sub>9</sub>                                                                            | <i>C</i> 1 2/ <i>m</i> 1                  | ICSD-69456   |
| 132 | Pavonite 8P             | Ag <sub>0.88</sub> Cu <sub>0.22</sub> Bi <sub>3.5</sub> Pb <sub>0.9</sub> S <sub>6.5</sub>                                                     | <i>C</i> 1 2/ <i>m</i> 1                  | ICSD-69458   |
| 133 | Pekoite                 | Cu <sub>0.7</sub> Pb <sub>0.7</sub> Bi <sub>11.3</sub> S <sub>14.94</sub> Se <sub>3.06</sub>                                                   | <i>P</i> 2 <sub>1</sub> <i>a m</i>        | ICSD-60151   |
| 134 | Pellouxite              | Ag <sub>0.26</sub> Cu <sub>0.68</sub> Pb <sub>10.44</sub> Sb <sub>11.56</sub> S <sub>27.5</sub> Cl <sub>0.5</sub> O <sub>0.5</sub>             | <i>C</i> 1 2/ <i>m</i> 1                  | ICSD-171096  |
| 135 | Pierrotite              | Tl <sub>2</sub> Sb <sub>6</sub> As <sub>4</sub> S <sub>16</sub>                                                                                | <i>P</i> <i>n a</i> 2 <sub>1</sub>        | ICSD-31358   |
| 136 | Pizgrischite            | Cu <sub>14.77</sub> Fe <sub>0.23</sub> PbBi <sub>17</sub> S <sub>35</sub>                                                                      | <i>C</i> 1 2/ <i>m</i> 1                  | ICSD-158481  |
| 137 | Protochabournéite       | Tl <sub>1.7</sub> Pb <sub>1.6</sub> As <sub>0.9</sub> Sb <sub>8.8</sub> S <sub>17</sub>                                                        | <i>P</i> –1                               | ICSD-189253  |
| 138 | Proudite                | Cu <sub>2</sub> Pb <sub>16</sub> Bi <sub>20</sub> S <sub>28.58</sub> Se <sub>18.42</sub>                                                       | <i>C</i> 1 2/ <i>m</i> 1                  | ICSD-163135  |
| 139 | Proudite                | Cu <sub>0.75</sub> Pb <sub>7.5</sub> Bi <sub>9.35</sub> S <sub>15</sub> Se <sub>7</sub>                                                        | <i>C</i> 1 2/ <i>m</i> 1                  | ICSD-30778   |
| 140 | Raberite                | Tl <sub>5</sub> Ag <sub>4</sub> As <sub>5.78</sub> Sb <sub>1.22</sub> S <sub>15</sub>                                                          | <i>P</i> –1                               | ICSD-190363  |
| 141 | Ramdohrite              | Pb <sub>6</sub> Sb <sub>11.57</sub> Ag <sub>2.43</sub> S <sub>24</sub>                                                                         | <i>P</i> 1 2 <sub>1</sub> / <i>n</i> 1    | ICSD-31237   |
| 142 | Ramdohrite              | Pb <sub>5.9</sub> Fe <sub>0.1</sub> Mn <sub>0.1</sub> In <sub>0.1</sub> Cd <sub>0.2</sub> Ag <sub>2.8</sub> Sb <sub>10.8</sub> S <sub>24</sub> | <i>P</i> 1 2 <sub>1</sub> / <i>n</i> 1    | ICSD-187591  |
| 143 | Rathite                 | Tl <sub>0.04</sub> Pb <sub>12.47</sub> Ag <sub>1.70</sub> As <sub>15.88</sub> Sb <sub>1.75</sub> S <sub>40.17</sub>                            | <i>P</i> 2 <sub>1</sub> / <i>c</i>        | [34]         |

|     |                              |                                                                                                            |                    |             |
|-----|------------------------------|------------------------------------------------------------------------------------------------------------|--------------------|-------------|
| 144 | Rathite                      | $\text{Tl}_{0.42}\text{Pb}_{11.84}\text{Ag}_{1.73}\text{As}_{17.73}\text{Sb}_{0.28}\text{S}_{40}$          | $P\ 2_1/c$         | [34]        |
| 145 | Rathite                      | $\text{Tl}_{0.84}\text{Pb}_{10.71}\text{Ag}_{1.73}\text{As}_{18.18}\text{Sb}_{0.41}\text{S}_{40.13}$       | $P\ 2_1/c$         | [34]        |
| 146 | Rathite                      | $\text{Tl}_{2.91}\text{Pb}_{6.67}\text{Ag}_{1.76}\text{As}_{19.77}\text{Sb}_{0.90}\text{S}_{40.17}$        | $P\ 2_1/c$         | [34]        |
| 147 | Rathite                      | $\text{Tl}_{2.16}\text{Pb}_{7.79}\text{Ag}_{1.89}\text{As}_{20}\text{Sb}_{0.9}\text{S}_{40.11}$            | $P\ 2_1/c$         | [34]        |
| 148 | Rathite                      | $\text{Pb}_{10.96}\text{Ag}_{1.9}\text{As}_{18.09}\text{Sb}_{1.06}\text{S}_{40}$                           | $P\ 1\ 2_1/c\ 1$   | ICSD-95878  |
| 149 | Rathite I                    | $\text{Pb}_3\text{As}_5\text{S}_{10}$                                                                      | $P\ 1\ 2_1/a\ 1$   | ICSD-26778  |
| 150 | Rebulite                     | $\text{Tl}_5\text{Sb}_{4.45}\text{As}_{8.55}\text{S}_{22}$                                                 | $P\ 1\ 2_1/c\ 1$   | ICSD-17065  |
| 151 | Robinsonite                  | $\text{Pb}_{4.03}\text{Sb}_{5.97}\text{S}_{13}$                                                            | $I\ 1\ 2/m\ 1$     | ICSD-151564 |
| 152 | Routhierite                  | $\text{Cu}_{0.847}\text{Ag}_{0.153}\text{TlHg}_2\text{As}_{1.274}\text{Sb}_{0.726}\text{S}_6$              | $I\ -4\ 2\ m$      | ICSD-190970 |
| 153 | Routhierite                  | $\text{TlCu}_{0.64}\text{Ag}_{0.36}\text{Hg}_{1.7}\text{As}_{1.7}\text{Sb}_{0.3}\text{Zn}_{0.3}\text{S}_6$ | $I\ -4\ 2\ m$      | ICSD-260077 |
| 154 | Routhierite                  | $\text{TlHgAsS}_3$                                                                                         | $I\ -4\ 2\ m$      | ICSD-610665 |
| 155 | Salzburgite                  | $\text{Cu}_{1.435}\text{Pb}_{1.5}\text{Bi}_{6.5}\text{S}_{12}$                                             | $P\ m\ c\ 2_1$     | ICSD-89857  |
| 156 | Sartorite                    | $\text{Tl}_{1.46}\text{Pb}_{8.08}\text{As}_{17.46}\text{S}_{35}$                                           | $P\ 1\ 2_1/c\ 1$   | ICSD-98138  |
| 157 | Sartorite                    | $\text{PbAs}_2\text{S}_4$                                                                                  | $P\ 1\ 2_1/n\ 1$   | ICSD-15464  |
| 158 | Sartorite                    | $\text{PbAs}_2\text{S}_4$                                                                                  | $P\ 1\ 2_1/n\ 1$   | ICSD-24449  |
| 159 | Semseyite                    | $\text{Pb}_9\text{Sb}_8\text{S}_{21}$                                                                      | $C\ 1\ 2/c\ 1$     | ICSD-38838  |
| 160 | Semseyite                    | $\text{Pb}_9\text{Sb}_8\text{S}_{21}$                                                                      | $C\ 1\ 2/c\ 1$     | ICSD-263528 |
| 161 | Senandorite (subcell)        | $\text{Ag}_4\text{Pb}_4\text{Sb}_{12}\text{S}_{24}$                                                        | $B\ b\ m\ m$       | ICSD-23666  |
| 162 | Terrywallaceite              | $\text{Ag}_{1.02}\text{Pb}_{0.87}\text{As}_{0.06}\text{Bi}_{1.47}\text{Sb}_{1.54}\text{S}_{5.94}$          | $P\ 1\ 2_1/c\ 1$   | COD-1557015 |
| 163 | Thallium triantimony sulfide | $\text{TlSb}_3\text{S}_5$                                                                                  | $P\ 1\ 2_1/c\ 1$   | ICSD-17058  |
| 164 | Uchucchacuaite               | $\text{Ag}_{1.041}\text{Mn}_{0.919}\text{Pb}_3\text{Sb}_{5.041}\text{S}_{12}$                              | $P\ 1\ 2_1/n\ 1$   | ICSD-107242 |
| 165 | Uchucchacuaite               | $\text{Ag}_{1.049}\text{Mn}_{0.901}\text{Pb}_3\text{Sb}_{5.049}\text{S}_{12}$                              | $P\ 1\ 2_1/n\ 1$   | ICSD-107354 |
| 166 | Uchucchacuaite               | $\text{Ag}_{1.049}\text{Mn}_{0.901}\text{Pb}_3\text{Sb}_{5.049}\text{S}_{12}$                              | $P\ 1\ 2_1/n\ 1$   | ICSD-107240 |
| 167 | Unnamed_lillianite homologue | $\text{Ag}_{0.71}\text{Pb}_{1.52}\text{Bi}_{1.32}\text{Sb}_{1.45}\text{S}_6$                               | $C\ m\ c\ m$       | ICSD-169975 |
| 168 | Vikingite                    | $\text{Ag}_{3.56}\text{Pb}_{10.88}\text{Bi}_{11.56}\text{S}_{30}$                                          | $C\ 1\ 2/m\ 1$     | ICSD-72805  |
| 169 | Vikingite Sb-rich            | $\text{Ag}_{2.85}\text{Pb}_{12.35}\text{Bi}_{9.52}\text{Sb}_{1.27}\text{S}_{30}$                           | $C\ 1\ 2/m\ 1$     | [39]        |
| 170 | Watkinsonite                 | $\text{Cu}_{1.68}\text{Ag}_{0.32}\text{PbBi}_4\text{Se}_8$                                                 | $P\ 1\ 2_1/m\ 1$   | ICSD-169942 |
| 171 | Weibullite                   | $\text{Ag}_{0.32}\text{Pb}_{5.09}\text{Bi}_{8.55}\text{Se}_{6.03}\text{S}_{11.97}$                         | $P\ n\ m\ a$       | ICSD-60147  |
| 172 | Wittichenite                 | $\text{Cu}_3\text{BiS}_3$                                                                                  | $P\ 2_1\ 2_1\ 2_1$ | ICSD-616615 |
| 173 | Wittichenite                 | $\text{Cu}_3\text{BiS}_3$                                                                                  | $P\ 2_1\ 2_1\ 2_1$ | ICSD-14305  |
| 174 | Wittichenite                 | $\text{Cu}_3\text{BiS}_3$                                                                                  | $P\ 2_1\ 2_1\ 2_1$ | ICSD-23645  |
| 175 | Zinkenite                    | $\text{Cu}_{1.56}\text{Pb}_{38}\text{Sb}_{86}\text{S}_{168}$                                               | $P\ 1$             | ICSD-263526 |

**Abbreviations:**

|       |                                                  |
|-------|--------------------------------------------------|
| AMCSD | American Mineralogist Crystal Structure Database |
| COD   | Crystallography Open Database                    |
| ICSD  | International Crystal Structure Database         |
| PC    | Personal Communication                           |
